# Supplementary material for: Photochemical synthesis of ZnO/Ag2O heterostructures with enhanced ultraviolet and visible photocatalytic activity
Source: Royal Society of Chemistry journal article supplement (doi:10.1039/c4ta00464g), 2014-01-01
Supplement: c4ta00464g2.pdf [file c4ta00464g2.pdf]

# Photochemical synthesis of ZnO/Ag<sub>2</sub>O heterostructures with enhanced ultraviolet and visible photocatalytic activity

Shuaishuai Ma,<sup>‡</sup> Jinjuan Xue,<sup>‡</sup> Yuming Zhou,<sup>\*</sup> Zewu Zhang

<sup>\*</sup> Corresponding author. Tel.: +86 25 52090617; fax: +86 25 52090617.

E-mail address: ymzhou@seu.edu.cn (Yuming Zhou).

<sup>‡</sup>S.S. Ma and J.J. Xue contributed equally to this work.

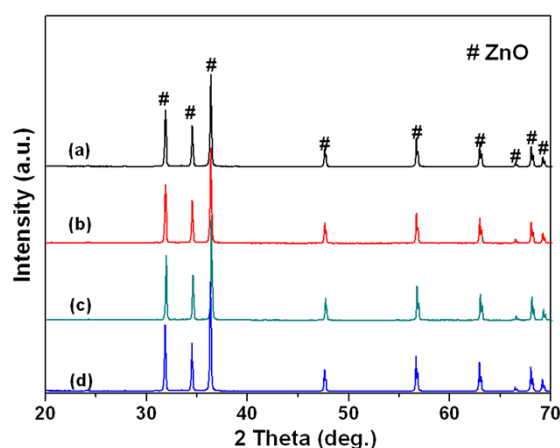

**Fig. S1** XRD patterns of the samples synthesized in dark under different experiment conditions: with deionized water as the solvent under (a) air atmosphere and (b) nitrogen atmosphere; with ethanol as the solvent under (c) air atmosphere and (d) nitrogen atmosphere.

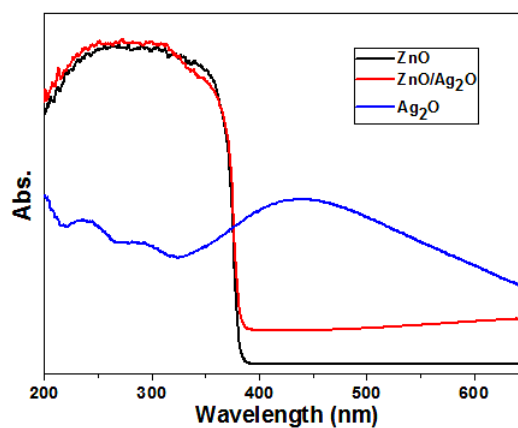

**Fig. S2** UV-vis DRS of the commercial ZnO, Ag<sub>2</sub>O and as-prepared ZnO/Ag<sub>2</sub>O heterostructures.
